# Supplementary material for: Detection of bacterial cells by impedance spectra via fluidic electrodes in a microfluidic device
Source: Royal Society of Chemistry journal article supplement (doi:10.1039/b925968f), 2010-01-01
Supplement: b925968f.pdf [file b925968f.pdf]

## Supplementary Information for Detection of bacterial cells by impedance spectra via fluidic electrodes in microfluidic device

Tao Zhu, Zhenhua Pei, Jianyong Huang, Chunyang Xiong, Shenggen Shi and Jing Fang

This supplement contains:

Materials and Methods

Figure S1

### Materials and methods

#### Chemicals

Peptone and ampicillin were purchased from Sigma Aldrich, USA. Tryptone and Yeast extract were from Oxoid, UK. PDMS monomer and curing agents Sylgard 184 were purchased from Dow Corning; SU-8 2025 photoresist and developer from MicroChem Corp., USA; other chemicals were obtained from the Department of Chemistry, Peking University, China; Deionized water was produced with a Milli-Q SP system. The conductivity of KCl (3 M) solution is  $281 \text{ mS}\cdot\text{cm}^{-1}$  and the conductivity of DI water is  $3 \mu\text{S}\cdot\text{cm}^{-1}$ , measured by a conductivity meter.

#### Microchip fabrication

The microfluidic chips were fabricated by standard soft-lithography. The mask was printed on a plastic film with a resolution of 3600 dpi. The width of the inlet channels is  $150 \mu\text{m}$ , and that for the confluent channel is  $100 \mu\text{m}$ , and the widths of the outlet channels are 50 and  $150 \mu\text{m}$  for bacterial suspension and KCl solution, respectively. The channel structure on silicon wafer was fabricated by SU-8 2025 photoresist with a thickness of  $30 \mu\text{m}$ . The PDMS (10:1) was poured onto the silicon curing at  $80^\circ\text{C}$  for 25 min. After the cured PDMS was peeled off from the silicon master mold, holes were punched with Harris Uni-cores for the inlets, outlets and electrode connections. Finally, the PDMS channels were bonded to a glass slide by using oxygen plasma and the Ag wires were punched into the chip. The chip sterilization was done by injecting 75% ethanol and exposing to UV light for 1 h before use.

#### Bacterial culture and media

*Porphyromonas gingivalis* ATCC33277, provided by Beijing Stomatological Research Center, was cultured on chocolate agar (5% sheep blood with  $5 \text{ mg}\cdot\text{mL}^{-1}$  hemin and  $1.0 \text{ mg}\cdot\text{L}^{-1}$  vitamin K1) incubated at  $37^\circ\text{C}$  in an anaerobic chamber (Anoxomat<sup>TM</sup> MarkII, Mart<sup>®</sup> Microbiology, Netherlands) with an atmosphere of 80% $\text{N}_2$ -10% $\text{CO}_2$ -10% $\text{H}_2$ . Culture purity was routinely checked by Gram staining and by colony morphology. Four-day-old *P. gingivalis* ATCC33277 cells were used to inoculate in Trypticase soy broth supplemented with yeast extract ( $1 \text{ mg}\cdot\text{mL}^{-1}$ ), hemin ( $5 \mu\text{g}\cdot\text{mL}^{-1}$ ) and cysteine ( $0.5 \mu\text{g}\cdot\text{mL}^{-1}$ ) were cultured anaerobically to late log phase at  $37^\circ\text{C}$ . *Escherichia coli* RP437 was cultured in a shaking incubator ( $30^\circ\text{C}$ , 200 rpm, 12 h). Then the fresh culture media was added with an volume ratio of 1:20 ( $30^\circ\text{C}$ , 200 rpm, 2 h). The bacterial cells were resuspended in centrifugal tubes with culture media and counted on an ordinary counting chamber. A series of dilutions were then created with concentrations ranging from  $10^3$  to  $10^9 \text{ cells}\cdot\text{mL}^{-1}$ . After that, these bacterial cells were centrifuged at  $8000 \times g$  for 3 mins and the supernatant was carefully aspirated. The mannitol was added to wash the sample followed by centrifuging and removing of the supernatant for two times to remove the solution ion. DI water was then added to the bacteria suspensions and laid at room temperature for 30 mins before tests.

#### Devices and electrical impedance spectroscopy (EIS)

Figure S1 illustrates the experimental setup for hydrodynamical manipulation and electrical interrogation of the bacteria suspension in DI water. The two Ag wires punched to the inlets of the KCl solution channels were connected with an LCR meter (Agilent 4980A, Agilent Technologies Inc.), to measure the impedance of the focused central layer with corresponding bacterial concentration. The measurement was an automatic process controlled by an acquisition program through an USB interface provided by Agilent. Impedance spectra were recorded in a sweep frequency range from 100 Hz to 1 MHz, with amplitude of 500 mV and 33 sampling data uniformly distributed on the logarithmic coordinates. The impedances at a fixed frequency of 1.2 kHz were also measured for detecting the bacterial concentrations with the same amplitude. All tests were performed at room temperature.

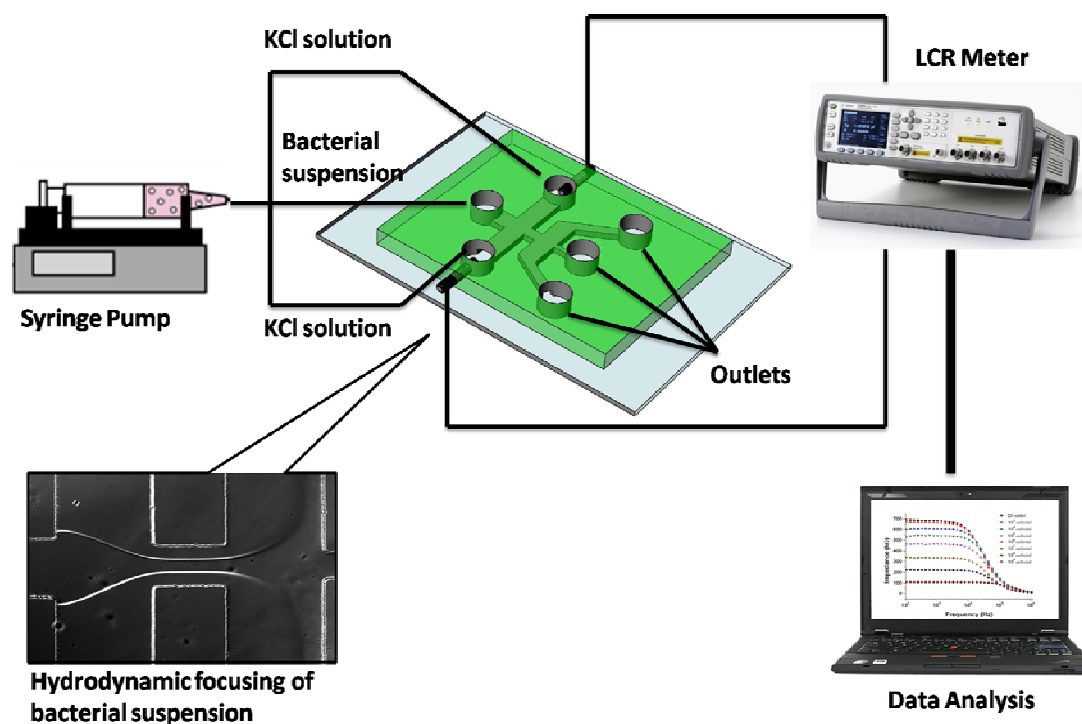

**Figure S1.** Experimental setup: a syringe pump controls the feeding speeds of the sample supply and the sheath flows to form hydrodynamic focusing; an impedance analyzer is connected with fluidic electrodes of KCl solution to record impedance spectra of the suspensions with different cell concentrations.
